# Supplementary material for: The determinants of home and nursing home death: a systematic review and meta-analysis
Source: Springer Nature journal article supplement (doi:10.1186/s12904-016-0077-8), 2016-01-20
Supplement: MOESM1 [file 9754602]

## Additional File 1: Literature Search Strategies

**Search date:** September 24, 2013

**Database:** EBM Reviews - Cochrane Database of Systematic Reviews <2005 to August 2013>, EBM Reviews - ACP Journal Club <1991 to September 2013>, EBM Reviews - Database of Abstracts of Reviews of Effects <3rd Quarter 2013>, EBM Reviews - Cochrane Central Register of Controlled Trials <August 2013>, EBM Reviews - Cochrane Methodology Register <3rd Quarter 2012>, EBM Reviews - Health Technology Assessment <3rd Quarter 2013>, EBM Reviews - NHS Economic Evaluation Database <3rd Quarter 2013>, Embase <1980 to 2013 Week 38>, Ovid MEDLINE(R) <1946 to September Week 2 2013>, Ovid MEDLINE(R) In-Process & Other Non-Indexed Citations <September 23, 2013>

Search Strategy:

| #  | Searches                                                                                                                                                                                   | Results |
|----|--------------------------------------------------------------------------------------------------------------------------------------------------------------------------------------------|---------|
| 1  | exp Terminal Care/                                                                                                                                                                         | 85970   |
| 2  | exp Palliative Care/ use mesz,acp,cctr,coch,clcmr,dare,clhta,cleed                                                                                                                         | 41033   |
| 3  | exp palliative therapy/ use emez                                                                                                                                                           | 60645   |
| 4  | exp Terminally Ill/ use mesz,acp,cctr,coch,clcmr,dare,clhta,cleed                                                                                                                          | 5617    |
| 5  | exp terminally ill patient/ use emez                                                                                                                                                       | 5877    |
| 6  | exp terminal disease/ use emez                                                                                                                                                             | 4477    |
| 7  | exp dying/ use emez                                                                                                                                                                        | 5616    |
| 8  | ((End adj2 life adj2 care) or EOL care or (terminal* adj2 (care or caring or ill* or disease*)) or palliat* or dying or (Advanced adj3 (disease* or illness*)) or end stage*).ti,ab.       | 335051  |
| 9  | or/1-8                                                                                                                                                                                     | 428351  |
| 10 | exp Hospices/ use mesz,acp,cctr,coch,clcmr,dare,clhta,cleed                                                                                                                                | 4349    |
| 11 | exp hospice/ use emez                                                                                                                                                                      | 6967    |
| 12 | exp Home Care Services/ use mesz,acp,cctr,coch,clcmr,dare,clhta,cleed                                                                                                                      | 41659   |
| 13 | exp Home Care Agencies/ use mesz,acp,cctr,coch,clcmr,dare,clhta,cleed                                                                                                                      | 1216    |
| 14 | exp home care/ use emez                                                                                                                                                                    | 51971   |
| 15 | exp Hospitalization/                                                                                                                                                                       | 367600  |
| 16 | exp Long-Term Care/ use mesz,acp,cctr,coch,clcmr,dare,clhta,cleed                                                                                                                          | 22720   |
| 17 | exp Nursing Homes/ use mesz,acp,cctr,coch,clcmr,dare,clhta,cleed                                                                                                                           | 32849   |
| 18 | exp nursing home/ use emez                                                                                                                                                                 | 37834   |
| 19 | exp Homes for the Aged/ use mesz,acp,cctr,coch,clcmr,dare,clhta,cleed                                                                                                                      | 11419   |
| 20 | exp home for the aged/ use emez                                                                                                                                                            | 8622    |
| 21 | ((home or domicij* or communit*) adj2 (visit* or care or caring or caregiver* or health?care or assist* or aid* or agenc* or service* or rehabilitation)).ti,ab.                           | 105277  |
| 22 | (hospice* or hospital* or in?hospital or long term care facilit*).ti,ab.                                                                                                                   | 1938041 |
| 23 | or/10-22                                                                                                                                                                                   | 2266328 |
| 24 | 9 and 23                                                                                                                                                                                   | 70404   |
| 25 | ((place or location or site) adj2 death) or ((death or dying or die) adj2 (home* or nursing home* or hospice* or hospital*)).ti,ab.                                                        | 21749   |
| 26 | 24 or 25                                                                                                                                                                                   | 88242   |
| 27 | exp Health Services Accessibility/ use mesz,acp,cctr,coch,clcmr,dare,clhta,cleed                                                                                                           | 85297   |
| 28 | exp Attitude to Death/                                                                                                                                                                     | 22572   |
| 29 | exp Decision Making/                                                                                                                                                                       | 258108  |
| 30 | exp Patient Satisfaction/                                                                                                                                                                  | 152037  |
| 31 | income/                                                                                                                                                                                    | 58245   |
| 32 | ((determin* or factor* or indicator* or predict* or prefer*) adj2 (death or dying or die or palliative care* or terminal* ill*)) or (access* adj2 (health care or health service*)).ti,ab. | 41641   |
| 33 | ((determin* or factor* or indicator* or predict* or prefer* or influence*) adj4 (end of life or place of death)).ti,ab.                                                                    | 1956    |

|                                                                                                                   |        |
|-------------------------------------------------------------------------------------------------------------------|--------|
| 34 or/27-33                                                                                                       | 597430 |
| 35 26 and 34                                                                                                      | 10309  |
| 36 limit 35 to english language [Limit not valid in CDSR,ACP Journal Club,DARE,CCTR,CLCMR; records were retained] | 9427   |
| 37 limit 36 to yr="2004 -Current" [Limit not valid in DARE; records were retained]                                | 5681   |
| 38 remove duplicates from 37                                                                                      | 3870   |

## CINAHL

| #   | Query                                                                                                                                                                           | Results |
|-----|---------------------------------------------------------------------------------------------------------------------------------------------------------------------------------|---------|
| S1  | (MH "Terminal Care+")                                                                                                                                                           | 38,863  |
| S2  | (MH "Palliative Care")                                                                                                                                                          | 19,643  |
| S3  | (MH "Terminally Ill Patients+")                                                                                                                                                 | 7,655   |
| S4  | ((End N2 life N2 care) or EOL care or (terminal* N2 (care or caring or ill* or disease*)) or palliat* or dying or (advanced N3 (disease* or illness*)) or end stage*)           | 52,080  |
| S5  | S1 OR S2 OR S3 OR S4                                                                                                                                                            | 60,054  |
| S6  | (MH "Hospices")                                                                                                                                                                 | 2,462   |
| S7  | (MH "Home Health Care+")                                                                                                                                                        | 32,531  |
| S8  | (MH "Home Health Agencies")                                                                                                                                                     | 4,471   |
| S9  | (MH "Hospitalization+")                                                                                                                                                         | 51,856  |
| S10 | (MH "Long Term Care")                                                                                                                                                           | 18,249  |
| S11 | (MH "Nursing Homes+")                                                                                                                                                           | 19,063  |
| S12 | ((home or domicil* or communit*) N2 (visit* or care or caring or caregiver* or health care or assist* or aid* or agenc* or service* or rehabilitation))                         | 71,862  |
| S13 | (hospice* or hospital* or in?hospital or long term care facilit*)                                                                                                               | 266,641 |
| S14 | S6 OR S7 OR S8 OR S9 OR S10 OR S11 OR S12 OR S13                                                                                                                                | 387,139 |
| S15 | S5 AND S14                                                                                                                                                                      | 19,811  |
| S16 | ((place or location or site) N2 death) or ((death or dying or die) N2 (home* or nursing home* or hospice* or hospital*))                                                        | 3,092   |
| S17 | S15 OR S16                                                                                                                                                                      | 21,726  |
| S18 | (MH "Health Services Accessibility+")                                                                                                                                           | 47,527  |
| S19 | (MH "Attitude to Death+")                                                                                                                                                       | 7,819   |
| S20 | (MH "Decision Making+")                                                                                                                                                         | 62,594  |
| S21 | (MH "Patient Satisfaction")                                                                                                                                                     | 30,524  |
| S22 | (MH "Income")                                                                                                                                                                   | 9,908   |
| S23 | ((determin* or factor* or indicator* or predict* or prefer*) N2 (death or dying or die or palliative care* or terminal* ill*)) or (access* N2 (health care or health service*)) | 57,923  |
| S24 | ((determin* or factor* or indicator* or predict* or prefer* or influence*) N4 (end of life or place of death))                                                                  | 913     |
| S25 | S18 OR S19 OR S20 OR S21 OR S22 OR S23 OR S24                                                                                                                                   | 162,112 |
| S26 | S17 AND S25                                                                                                                                                                     | 5,003   |
| S27 | S17 AND S25<br>Limiters - Published Date: 20040101-20131231; English Language                                                                                                   | 3,295   |
